# Supplementary material
Source: PubMed Central journal article supplement (PMC4245379)

**Supplementary Figure 1. Linear and quadratic changes for ALC participants for each neurocognitive measure across assessment points.**

Blue circles: AP1; Green circles: AP2; Red circles: AP3

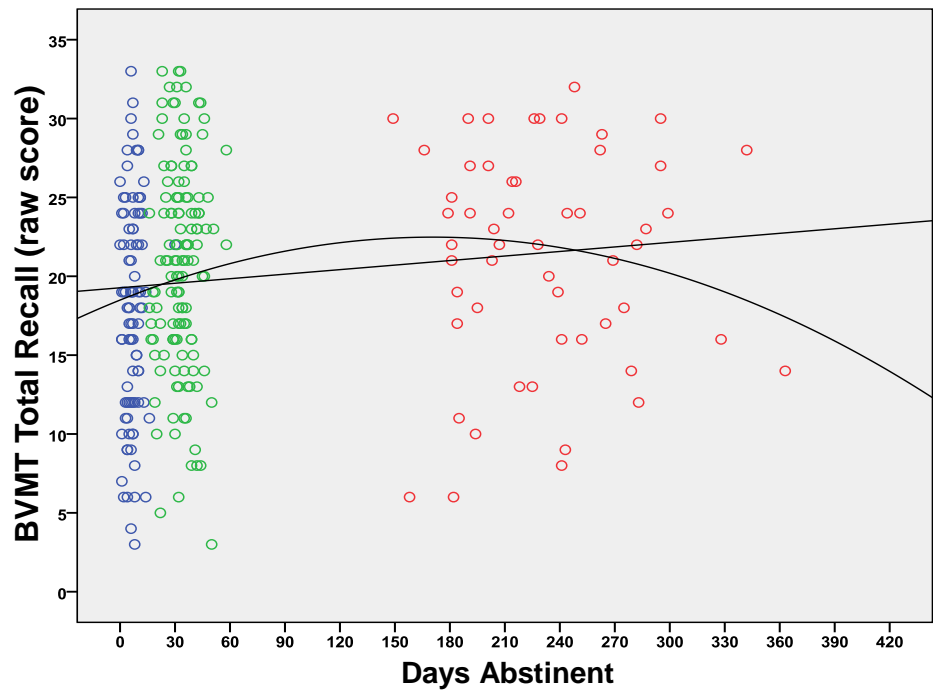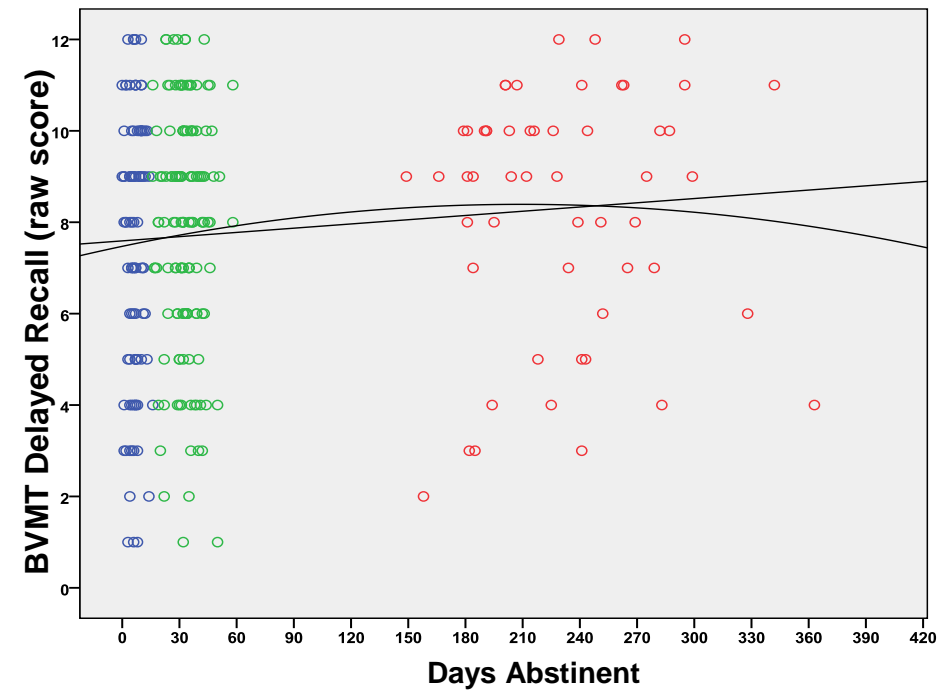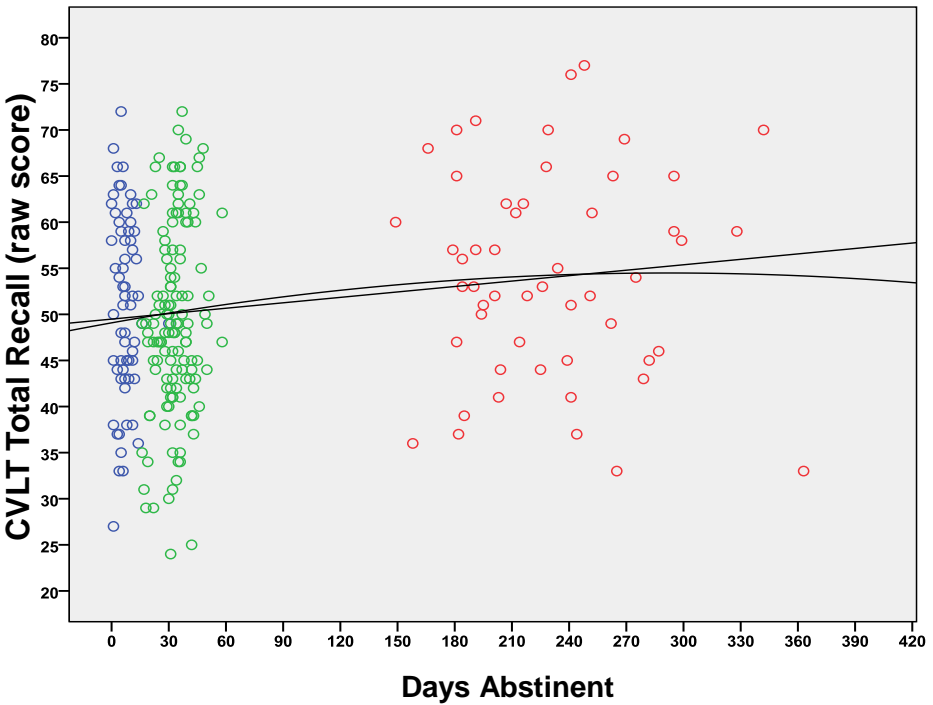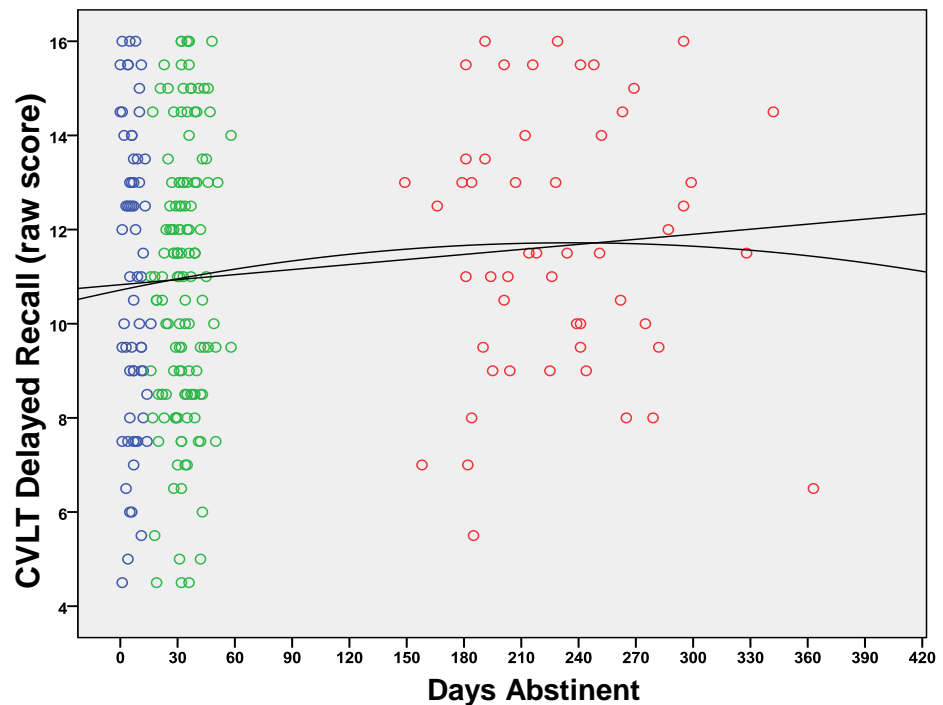

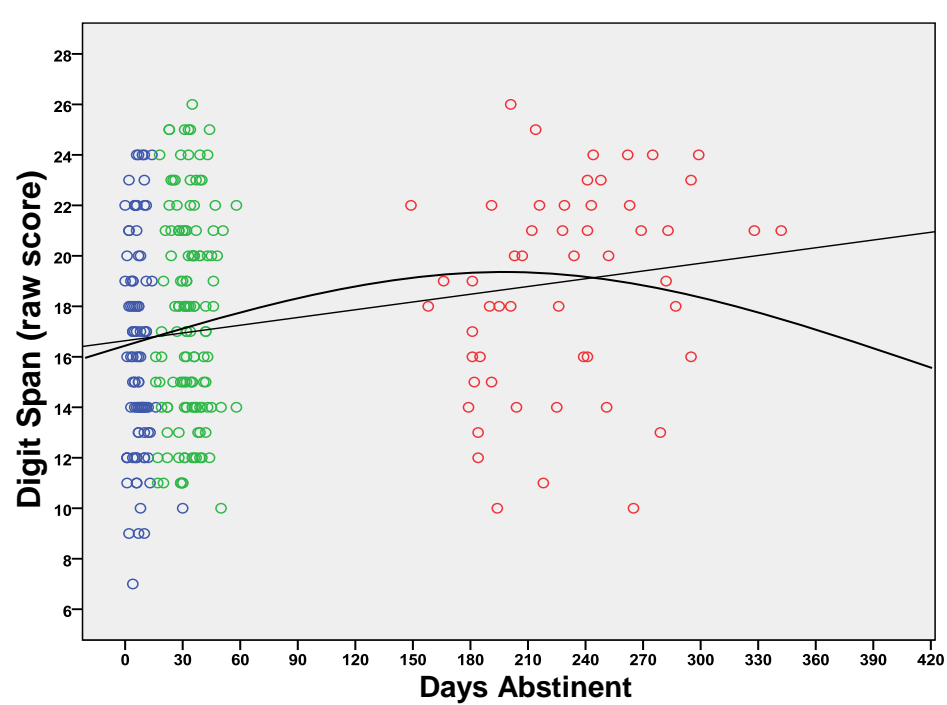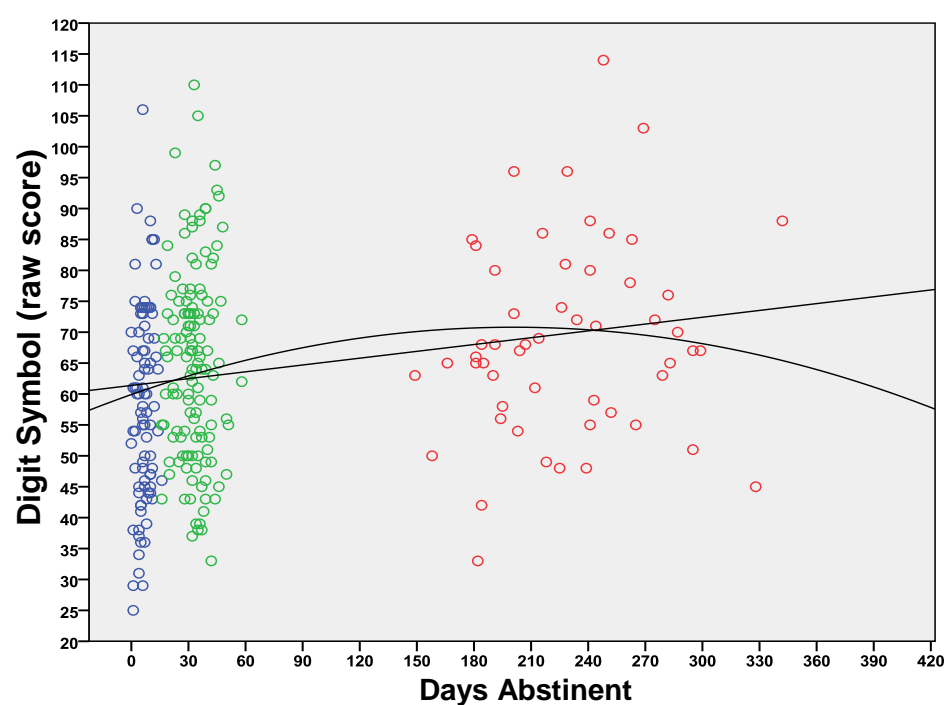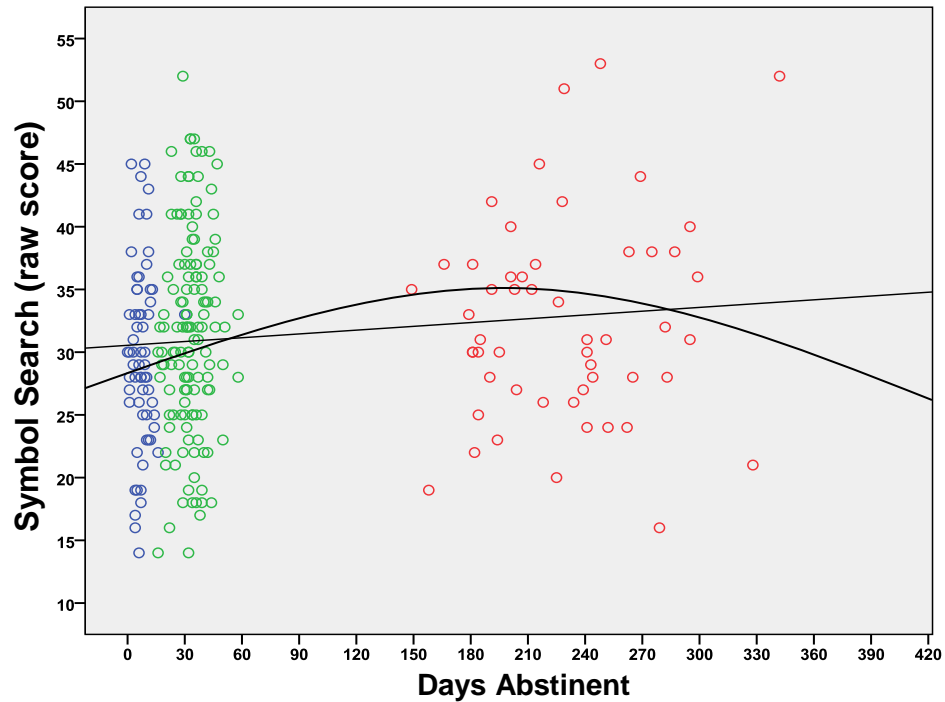

Supplement: NIHMS623380-supplement-Supp_FigureS1.pdf [file NIHMS623380-supplement-Supp_FigureS1.pdf]
